# Supplementary material for: Solution-processed transparent ferroelectric nylon thin films
Source: PubMed Central journal article supplement — Sci Adv. 2019 Aug 16;5(8):eaav3489. doi: 10.1126/sciadv.aav3489 (PMC6697430; doi:10.1126/sciadv.aav3489), 2019-08-16
Supplement: aav3489_SM.pdf [file aav3489_SM.pdf]

## Supplementary Materials for

### Solution-processed transparent ferroelectric nylon thin films

Saleem Anwar, Daniel Pinkal, Wojciech Zajaczkowski, Philipp von Tiedemann, Hamed Sharifi Dehsari, Manasvi Kumar, Thomas Lenz, Ulrike Kemmer-Jonas, Wojciech Pisula, Manfred Wagner, Robert Graf, Holger Frey, Kamal Asadi\*

\*Corresponding author. Email: asadi@mpip-mainz.mpg.de

Published 16 August 2019, *Sci. Adv.* **5**, eaav3489 (2019)  
DOI: 10.1126/sciadv.aav3489

#### This PDF file includes:

- Fig. S1. *D-E* hysteresis loop and switching current of MQS nylon-11.
- Fig. S2. <sup>13</sup>C solution NMR spectra of the TFA:acetone-*d*<sub>6</sub> mixture.
- Fig. S3. <sup>1</sup>H solution NMR spectra of the TFA:acetone-*d*<sub>6</sub> mixture.
- Fig. S4. <sup>1</sup>H-NMR DOSY measurement (850.3 MHz at 298 K) of nylon-11 solution in pure TFA (red spectrum) and 50:50 mol % mixture of TFA:acetone-*d*<sub>6</sub> (black spectrum).
- Fig. S5. Haze as a function of film thickness of nylon-11.
- Fig. S6. DSC curves of SQ and MQS nylon-11 films.
- Fig. S7. Room-temperature FTIR spectra of the SQ thin film compared with MQS film of nylon-11.
- Fig. S8. WAXD pattern of the MQS film along the parallel and perpendicular to the stretch direction.
- Table S1. Literature overview of the crystalline phases of nylon-11 at room temperature.
- Table S2. Comparing the ferroelectric properties,  $P_r$ , and  $E_C$  of nylon-11 and nylon-5 with those of PVDF and P(VDF-TrFE) reported in literature.
- References (34–44)

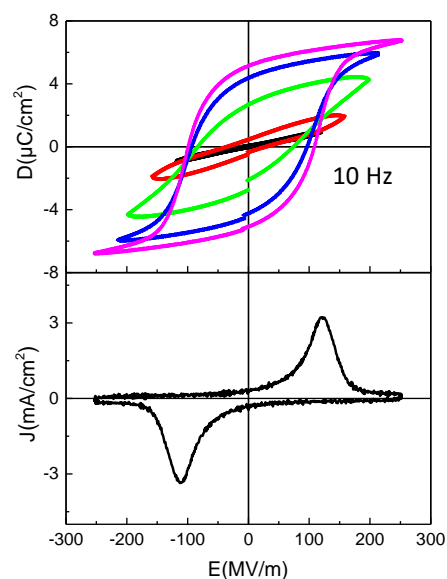

**Fig. S1.** *D-E* hysteresis loop and switching current of MQS nylon-11.

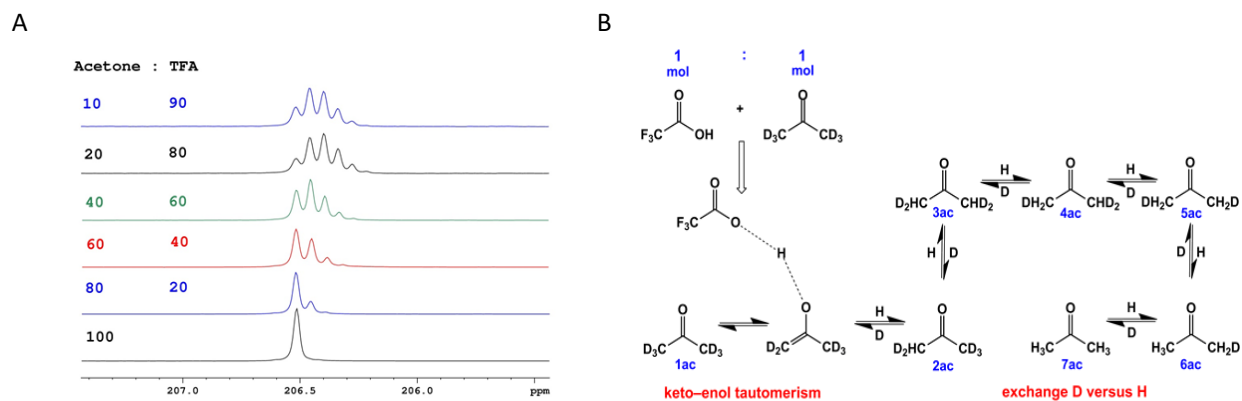

**Fig. S2.**  $^{13}\text{C}$  solution NMR spectra of the TFA:acetone- $d_6$  mixture. (A) The spectra (213.8 MHz at 298K) of different mixtures of TFA:acetone- $d_6$ . All spectra are recalibrated to the 100 % acetone- $d_6$  signal at 206.3 ppm. (B) Scheme: the induced exchange of deuterium with a proton via the keto-enol-tautomerism. Seven different compounds (1ac, 2ac...7ac) of acetone H/D exchange molecules exist and at least six of them can be detected.

A

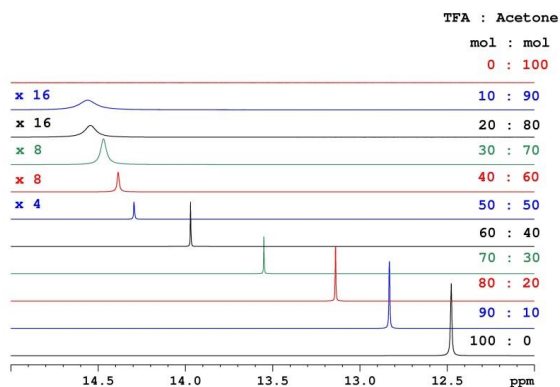

B

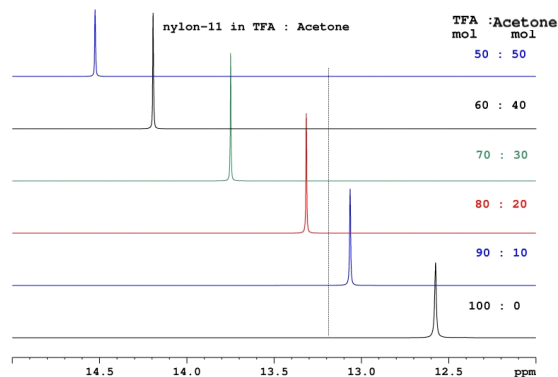

**Fig. S3.  $^1\text{H}$  solution NMR spectra of the TFA:acetone- $d_6$  mixture. (A)** (850.3 MHz at 298K) of different mixtures of TFA:acetone- $d_6$ . **(B)**  $^1\text{H}$  NMR (850.3 MHz at 298K) of nylon-11 solution in different TFA:acetone- $d_6$  solvent mixtures. The chemical shift calibration for proton spectra was done with an external capillary filled with  $\text{C}_2\text{D}_2\text{HCl}_4$  (5.93 ppm) inside the different samples tubes.

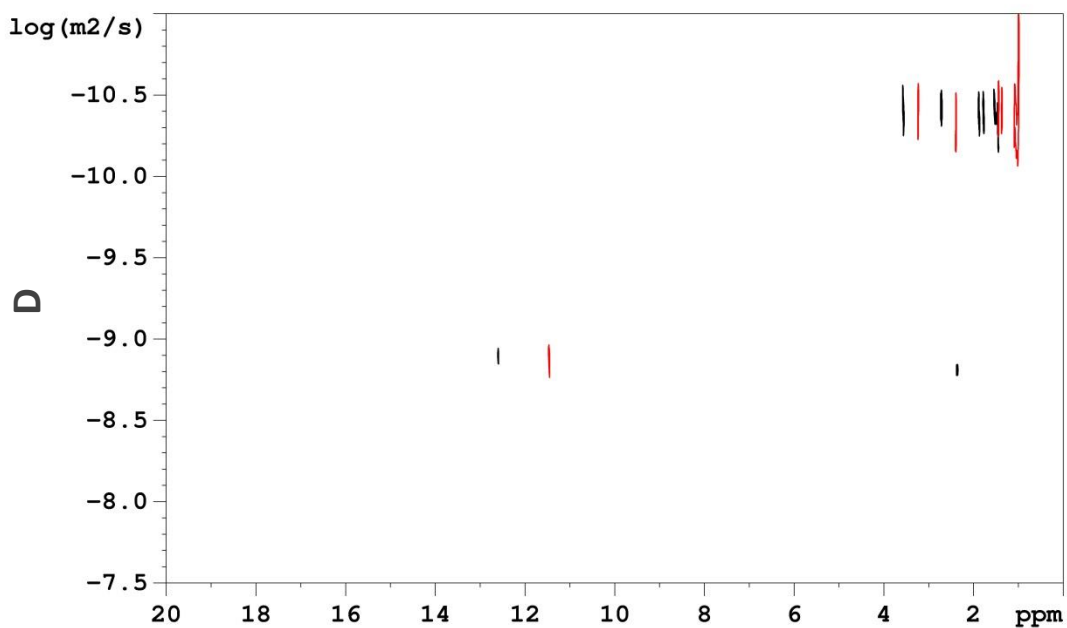

**Fig. S4.**  $^1\text{H}$ -NMR DOSY measurement (850.3 MHz at 298 K) of nylon-11 solution in pure TFA (red spectrum) and 50:50 mol % mixture of TFA:acetone- $d_6$  (black spectrum). The chemical shift calibration was done with an external capillary filled with  $\text{C}_2\text{HDCl}_4$  (5.93 ppm).

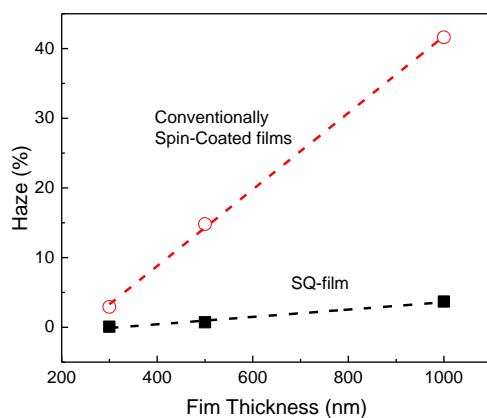

**Fig. S5.** Haze as a function of film thickness of nylon-11. The conventional spin-coated and the SQ thin films are compared. The dash lines are a guide to the eye.

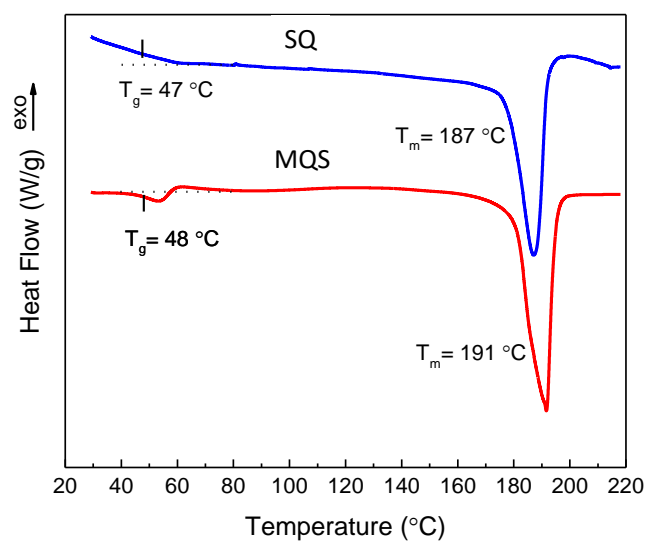

**Fig. S6. DSC curves of SQ and MQS nylon-11 films.**

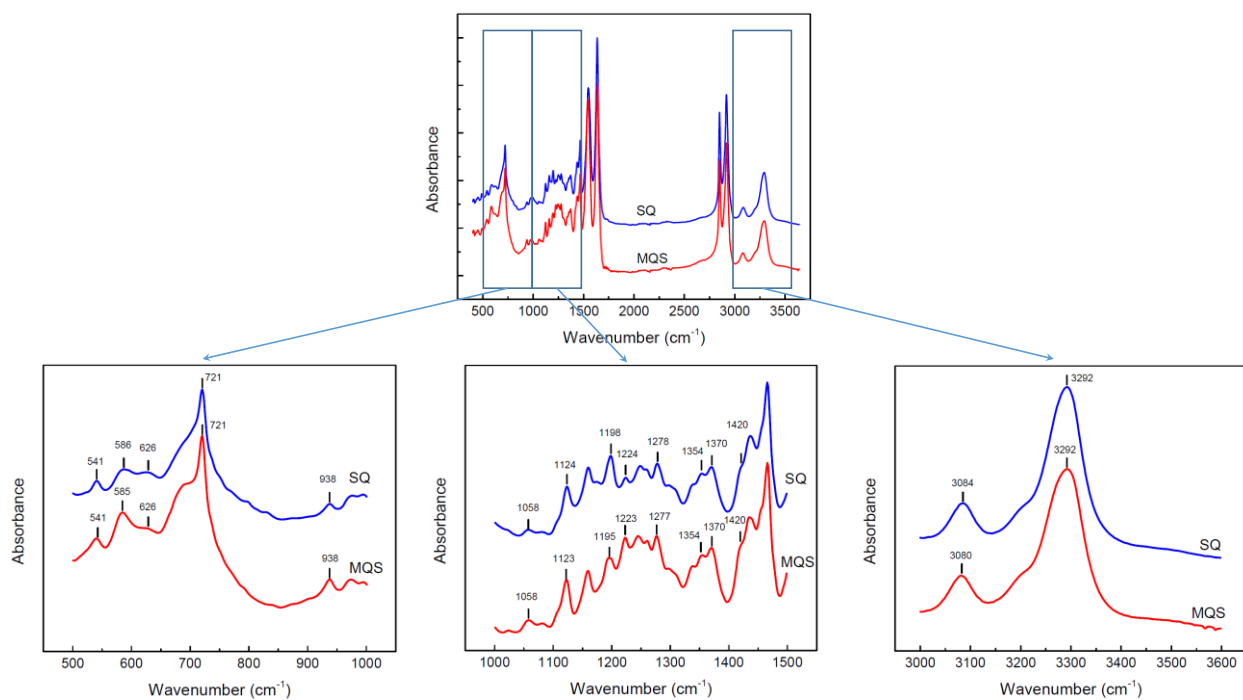

**Fig. S7. Room-temperature FTIR spectra of the SQ thin film compared with MQS film of nylon-11.**

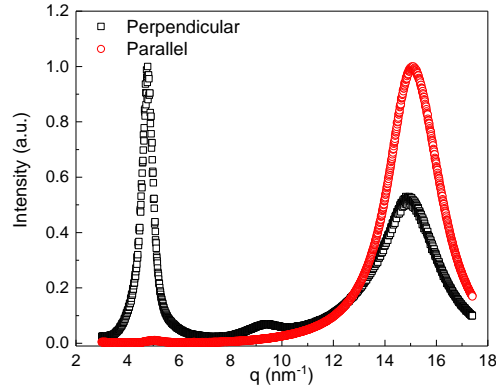

**Fig. S8.** WAXD pattern of the MQS film along the parallel and perpendicular to the stretch direction.

**Table S1.** Literature overview of the crystalline phases of nylon-11 at room temperature.

| Phase     | Ref.      | (001)                     |                          |                   | (100)                     |                          |                   | (010)                     |                          |                   |
|-----------|-----------|---------------------------|--------------------------|-------------------|---------------------------|--------------------------|-------------------|---------------------------|--------------------------|-------------------|
|           |           | $2\theta$ ( $^{\circ}$ D) | $q$ ( $\text{nm}^{-1}$ ) | $d$ -spacing (nm) | $2\theta$ ( $^{\circ}$ D) | $q$ ( $\text{nm}^{-1}$ ) | $d$ -spacing (nm) | $2\theta$ ( $^{\circ}$ D) | $q$ ( $\text{nm}^{-1}$ ) | $d$ -spacing (nm) |
| $\alpha$  | (20)      | 7.5                       | -                        | 1.17              | 19.9                      | -                        | 0.445             | 23.7                      | -                        | 0.374             |
|           | (7)       | 7.4                       | -                        | 1.19              | 20.2                      | -                        | 0.439             | 22.9                      | -                        | 0.388             |
|           | (15)      | -                         | 5.62                     | 1.11              | -                         | 14.50                    | 0.433             | -                         | 16.96                    | 0.370             |
|           | (38)      | -                         | -                        | -                 | -                         | -                        | 0.44              | -                         | -                        | 0.37              |
|           | (39)      | -                         | -                        | 1.133             | -                         | -                        | 0.444             | -                         | -                        | 0.372             |
|           | (40)      | -                         | -                        | 1.19              | -                         | -                        | 0.433             | -                         | -                        | 0.372             |
|           | (41)      | -                         | -                        | 1.133             | -                         | -                        | 0.444             | -                         | -                        | 0.372             |
|           | (42)      | -                         | -                        | -                 | -                         | -                        | 0.437             | -                         | -                        | 0.382             |
| $\alpha'$ | (20)      | 7.2                       | -                        | 1.227             | 20.2                      | -                        | 0.440             | 23.1                      | -                        | 0.384             |
|           | (7)       | 7.4                       | -                        | 1.19              | 21.1                      | -                        | 0.421             | 22.9                      | -                        | 0.388             |
|           | (39,41)   | -                         | -                        | 1.195             | -                         | -                        | 4.40              | -                         | -                        | 0.382             |
|           | (9)       | -                         | -                        | -                 | 21                        | -                        | -                 | 23                        | -                        | 0.392             |
| $\gamma$  | (20)      | 5.9                       | -                        | 1.49              | 21.3                      | -                        | 0.416             | 21.8                      | -                        | 0.406             |
|           | (15,3)    | -                         | 4.27                     | 1.47              | -                         | 15.08                    | 0.417             | -                         | 15.85                    | 0.396             |
|           | (40)      | -                         | -                        | 1.44              | -                         | -                        | -                 | -                         | 0.408                    | -                 |
| $\gamma'$ | (22)      | 5.97*                     | -                        | 1.48              | 21.5                      | -                        | -                 | -                         | 0.410                    | -                 |
| $\delta'$ | (20)      | 7.1                       | -                        | 1.24              | 21.4                      | -                        | -                 | -                         | 0.414                    | -                 |
|           | (3)       | -                         | 4.8                      | 1.306             | -                         | 14.75                    | -                 | -                         | 0.426                    | -                 |
|           | (9,22,43) | -                         | -                        | -                 | -                         | -                        | -                 | -                         | 0.416                    | -                 |
|           | (44)      | 6.8                       | -                        | 1.299             | 21.1                      | -                        | -                 | -                         | 0.421                    | -                 |
|           | (38)      | -                         | -                        | -                 | -                         | -                        | -                 | -                         | 0.420                    | -                 |
|           | (40)      | -                         | -                        | -                 | -                         | -                        | -                 | -                         | 0.411                    | -                 |
| This work | MQS       | -                         | 4.79                     | 1.311             | -                         | 15.08                    | -                 | -                         | 0.417                    | -                 |
|           | SQ        | -                         | 4.79                     | 1.311             | -                         | 15.30                    | -                 | -                         | 0.411                    | -                 |

\* Reported for 002, which is the second order reflection of 001 peak

**Table S2. Comparing the ferroelectric properties,  $P_r$ , and  $E_c$  of nylon-11 and nylon-5 with those of PVDF and P(VDF-TrFE) reported in literature.**

| Ferroelectric Polymer        | $P_r$<br>( $\mu\text{C}/\text{cm}^2$ ) | $E_c$<br>(MV/m) | $P_r$ @ $10^6$ cycles *<br>( $\mu\text{C}/\text{cm}^2$ ) | $P_r$ @ $10^6$ cycles ‡<br>( $\mu\text{C}/\text{cm}^2$ ) |
|------------------------------|----------------------------------------|-----------------|----------------------------------------------------------|----------------------------------------------------------|
| PVDF ( $\delta$ -Phase) (34) | 7.0                                    | 115             | 6.1                                                      | N.R.                                                     |
| PVDF ( $\beta$ -Phase) (35)  | 5.8*                                   | 90              | N.R.                                                     | N.R.                                                     |
| PVDF ( $\beta$ -Phase) (35)  | 6.3†                                   | 90              | N.R.                                                     | N.R.                                                     |
| P(VDF-TrFE)                  |                                        |                 |                                                          |                                                          |
| 50/50 (36)                   | 4.7                                    | 65              | N.R.                                                     | N.R.                                                     |
| 65/35 (29)                   | 7.0                                    | 60              | 2.5                                                      | 3.3                                                      |
| 70/30 (37)                   | 6.3                                    | 65              | 0.8                                                      | N.R.                                                     |
| 80/20 (36)                   | 6.5                                    | 82              | N.R.                                                     | N.R.                                                     |
| Nylon-5 MQS (4)              | 12.5                                   | 125             | N. R.                                                    | N.R.                                                     |
| Nylon-11 SQ (this work)      | 4.5                                    | 200             | 4.5                                                      | 4.5                                                      |

N.R. stands for not reported.

\* uni-axially oriented PVDF film.

† bi-axially oriented PVDF film.

\*  $P_r$  measured without applying any resting time between two consecutive pulses.

‡  $P_r$  measured after applying a resting time of 5 seconds between two consecutive pulses.
